# Supplementary material
Source: publisher figshare collection journal article supplement (https://springernature.figshare.com/ndownloader/files/18091670)

Additional file 1


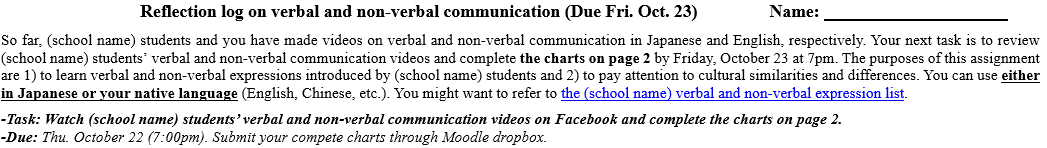


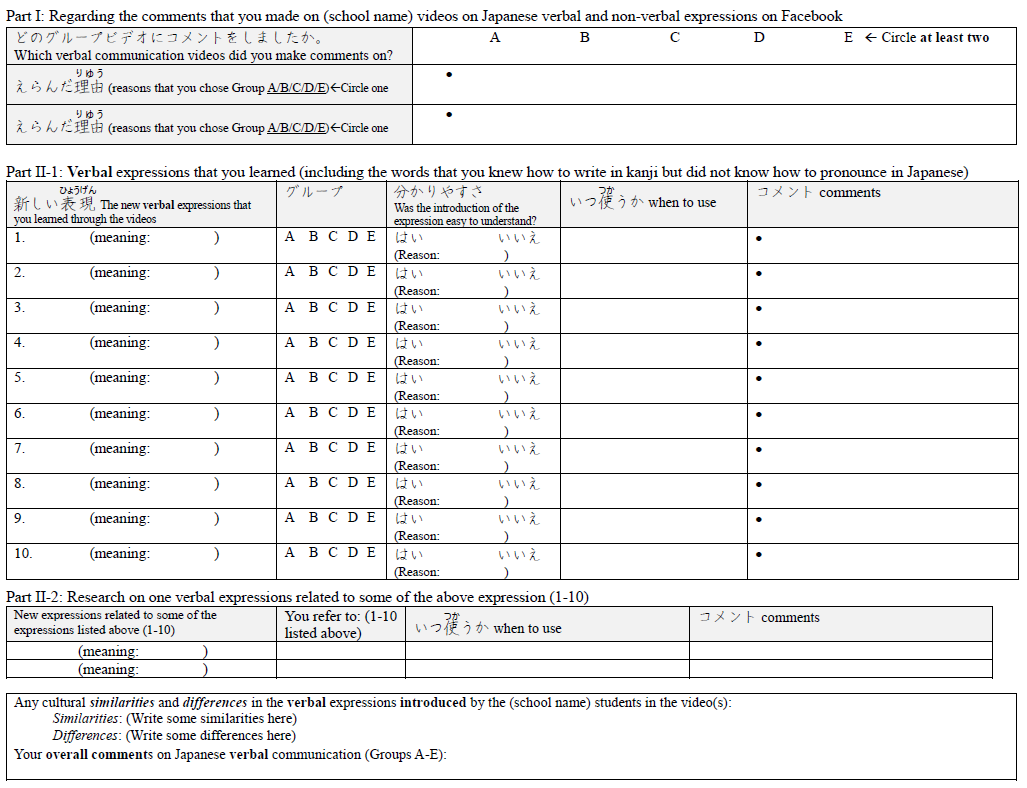


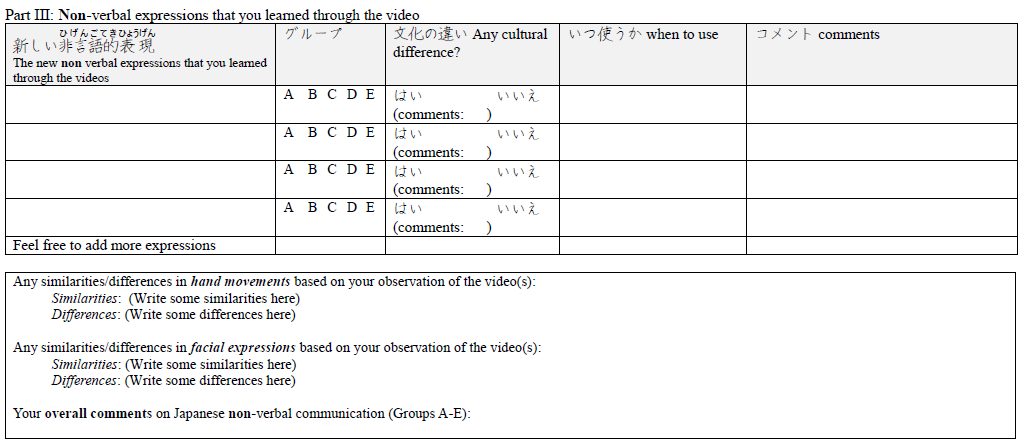

Supplement: Supplementary file 1 [file 18091670]
